# Supplementary material for: Smac mimetic induces cell death in a large proportion of primary acute myeloid leukemia samples, which correlates with defined molecular markers
Source: PubMed Central journal article supplement (PMC5226527; doi:10.18632/oncotarget.10390), 2016-07-02
Supplement: oncotarget-07-49539-s002.pdf [file oncotarget-07-49539-s002.pdf]

**Supplemental Table 1: Clinical characteristics for newly diagnosed AML patients (n=67).**

| # AML | age  | sex | karyotype        | t(8;21) | inv(16) | t(15;17) | t(9;11) | FLT3<br>ITD | FLT3<br>TKD | CEBPA | NRAS | NPM1 |
|-------|------|-----|------------------|---------|---------|----------|---------|-------------|-------------|-------|------|------|
| 1     | 32.8 | m   | CBF              | WT      | MUT     | WT       | WT      | WT          | WT          | WT    | WT   | WT   |
| 2     | 55.2 | w   | normal           | WT      | WT      | WT       | WT      | WT          | WT          | MUT   |      | MUT  |
| 3     | 61.4 | m   | del12/normal     |         |         |          |         | MUT         | WT          | WT    |      | MUT  |
| 4     | 56.1 | m   | normal           | WT      | WT      | WT       | WT      | WT          | MUT         | WT    |      | MUT  |
| 5     | 21.0 | m   | CBF              | WT      | MUT     | WT       | WT      | WT          | WT          | WT    | WT   | WT   |
| 6     | 57.0 | m   |                  |         |         |          |         |             |             |       |      |      |
| 7     | 50.8 | m   | normal           | WT      | WT      | WT       | WT      | WT          | MUT         | WT    |      | MUT  |
| 8     | 46.1 | m   | normal           | WT      | WT      | WT       | WT      | MUT         | WT          | WT    |      | MUT  |
| 9     | 73.6 | w   | normal           | WT      | WT      | WT       | WT      | MUT         | WT          |       |      | MUT  |
| 10    | 46.9 | w   | normal           | WT      | WT      | WT       | WT      | MUT         | WT          | WT    |      | WT   |
| 11    | 32.6 | m   | inv3; -7         | WT      | WT      | WT       | WT      | WT          | WT          | WT    |      | WT   |
| 12    | 76.5 | m   | normal           | WT      | WT      | WT       | WT      | WT          | WT          | WT    |      | MUT  |
| 13    | 47.8 | w   | normal           | WT      | WT      | WT       | WT      | MUT         | WT          | WT    |      | MUT  |
| 14    | 55.9 | m   | normal           | WT      | WT      | WT       | WT      | WT          | WT          | MUT   |      | WT   |
| 15    | 57.5 | m   | del13            | WT      | WT      | WT       | WT      | MUT         | WT          | WT    |      | WT   |
| 16    | 23.7 | w   | normal           | WT      | WT      | WT       | WT      | WT          | MUT         | MUT   |      | WT   |
| 17    | 81.7 | w   | normal           | WT      | WT      | WT       | WT      | WT          | WT          | WT    |      | WT   |
| 18    | 58.5 | w   | +8               | WT      | WT      | WT       | WT      | MUT         | WT          | WT    |      | WT   |
| 19    | 48.5 | m   | normal           | WT      | WT      | WT       | WT      | WT          | WT          | WT    |      | WT   |
| 20    | 44.6 | w   | normal           | WT      | WT      | WT       | WT      | MUT         | WT          | WT    |      | MUT  |
| 21    | 66.9 | m   | complex          | WT      | WT      | WT       | WT      | WT          | WT          |       |      | WT   |
| 22    |      | m   |                  |         |         |          |         |             |             |       |      |      |
| 23    | 61.0 | m   | t(2;14)          | WT      | WT      | WT       | WT      | MUT         | WT          |       |      | WT   |
| 24    | 26.8 | w   | +21              | WT      | WT      | WT       | WT      | WT          | WT          | MUT   |      | WT   |
| 25    | 33.8 | m   | CBF              | WT      | MUT     | WT       | WT      | WT          | WT          | WT    |      | WT   |
| 26    | 53.5 | w   | normal           | WT      | WT      | WT       | WT      | WT          | MUT         | WT    |      | MUT  |
| 27    | 57.0 | w   | CBF              | WT      |         | WT       | WT      | WT          | WT          | WT    |      | WT   |
| 28    | 30.8 | w   | normal           | WT      | WT      | WT       | WT      | WT          | WT          | MUT   |      | WT   |
| 29    | 31.6 | w   | normal           | WT      | WT      | WT       | WT      | WT          | MUT         | WT    |      | MUT  |
| 30    | 58.2 | m   | normal           | WT      | WT      | WT       | WT      | WT          | WT          | WT    |      | MUT  |
| 31    | 28.1 | w   | CBF              | WT      | MUT     | WT       | WT      | WT          | WT          | WT    |      | WT   |
| 32    | 62.2 | w   | normal           | WT      | WT      | WT       | WT      | MUT         | WT          |       |      | MUT  |
| 33    | 28.8 | m   | complex          | WT      | WT      | WT       | WT      | WT          | WT          | WT    |      | WT   |
| 34    | 66.6 | w   | normal           | WT      | WT      | WT       | WT      | MUT         | WT          |       |      | MUT  |
| 35    | 65.8 | m   | +8 +4            | WT      | WT      | WT       | WT      | WT          | WT          |       |      | WT   |
| 36    | 41.8 | m   | normal           | WT      | WT      | WT       | WT      | MUT         | WT          | WT    |      | WT   |
| 37    | 20.3 | m   | +11              | WT      | WT      | WT       | WT      | WT          | WT          |       |      | WT   |
| 38    | 75.0 | w   | normal           | WT      | WT      | WT       | WT      | MUT         | WT          |       |      | MUT  |
| 39    | 49.6 | m   | normal           | WT      | WT      | WT       | WT      | WT          | MUT         | WT    |      | MUT  |
| 40    | 68.2 | m   | normal           | WT      | WT      | WT       | WT      | WT          | WT          |       |      | WT   |
| 41    |      |     |                  |         |         |          |         |             |             |       |      |      |
| 42    | 39.5 | m   | normal           | WT      | WT      | WT       | WT      | MUT         | WT          | WT    |      | MUT  |
| 43    | 46.5 | w   | normal           | WT      | WT      | WT       | WT      | MUT         | WT          | WT    |      | MUT  |
| 44    | 71.4 | w   | normal           | WT      | WT      | WT       | WT      | MUT         | WT          |       |      | WT   |
| 45    | 61.8 | w   | t(7;15); t(9;22) | WT      | WT      | WT       | WT      | WT          | WT          |       |      | WT   |
| 46    | 71.7 | m   | normal           | WT      | WT      | WT       | WT      | MUT         | WT          |       |      | MUT  |
| 47    | 58.2 | w   | t(15;17)         | WT      | WT      | MUT      | WT      | WT          | WT          | WT    |      | WT   |
| 48    | 70.2 | w   | complex          | WT      | WT      | WT       | WT      | WT          | WT          |       |      | WT   |
| 49    | 46.6 | w   | CBF              | WT      | MUT     | WT       | WT      | WT          | WT          |       |      | WT   |
| 50    | 66.8 | w   | normal           | WT      | WT      | WT       | WT      | WT          | WT          |       |      | WT   |
| 51    | 52.1 | w   | CBF              | MUT     | WT      | WT       | WT      | WT          | WT          | WT    |      | WT   |
| 52    | 78.0 | w   | normal           | WT      | WT      | WT       | WT      | WT          | WT          |       |      | MUT  |
| 53    | 68.3 | m   | complex          | WT      | WT      | WT       | WT      | WT          | WT          |       |      | WT   |
| 54    | 47.7 | m   | normal           | WT      | WT      | WT       | WT      | WT          | WT          | WT    |      | MUT  |
| 55    | 50.6 | m   |                  | WT      | WT      | WT       | WT      | WT          | WT          | WT    |      | MUT  |
| 56    |      |     |                  |         |         |          |         |             |             |       |      |      |
| 57    | 68.7 | m   | normal           | WT      | WT      | WT       | WT      | MUT         | WT          |       |      | MUT  |
| 58    | 41.2 | w   | CBF              |         |         |          |         |             |             |       |      |      |
| 59    |      |     |                  |         |         |          |         |             |             |       |      |      |
| 60    |      |     |                  |         |         |          |         |             |             |       |      |      |
| 61    | 57.6 | m   | normal           | WT      | WT      | WT       | WT      | MUT         | WT          | WT    |      | MUT  |
| 62    | 69.5 | m   | normal           | WT      | WT      | WT       | WT      | WT          | WT          |       |      | WT   |
| 63    | 72.0 | w   | normal           | WT      | WT      | WT       | WT      | WT          | WT          |       |      | WT   |
| 64    | 33.0 | m   | CBF              | WT      | MUT     | WT       | WT      | WT          | WT          | WT    |      | WT   |
| 65    | 76.8 | w   | normal           | WT      | WT      | WT       | WT      | WT          | WT          |       |      | MUT  |
| 66    | 70.8 | w   | +13              | WT      | WT      | WT       | WT      | WT          | WT          |       |      | WT   |
| 67    | 58.7 | m   | normal           | WT      | WT      | WT       | WT      | MUT         | WT          |       |      | MUT  |

**Supplemental Table 2: Clinical, cytogenetic and molecular genetic characteristics of primary AML samples (n=12) profiled on microarrays to obtain BV6 response associated signature.**

| # AML | age | sex | karyotype    | t(15;17) | t(9;11) | FLT3<br>ITD | FLT3<br>TKD | CEBPA | NPM1 | BV6<br>response<br>group | ara-C<br>response<br>group |
|-------|-----|-----|--------------|----------|---------|-------------|-------------|-------|------|--------------------------|----------------------------|
| 3     | 61  | m   | del12/normal | n.a.     | n.a.    | MUT         | WT          | WT    | MUT  | sensitive                | resistant                  |
| 18    | 58  | w   | +8           | WT       | WT      | MUT         | WT          | WT    | WT   | sensitive                | sensitive                  |
| 29    | 32  | w   | normal       | WT       | WT      | WT          | MUT         | WT    | MUT  | sensitive                | sensitive                  |
| 49    | 47  | w   | CBF          | WT       | WT      | WT          | WT          | n.a.  | WT   | sensitive                | sensitive                  |
| 54    | 48  | m   | normal       | WT       | WT      | WT          | WT          | WT    | MUT  | sensitive                | sensitive                  |
| 65    | 77  | w   | normal       | WT       | WT      | WT          | WT          | n.a.  | MUT  | sensitive                | intermediate               |
| 2     | 55  | w   | normal       | WT       | WT      | WT          | WT          | MUT   | MUT  | resistant                | n.a.                       |
| 12    | 76  | m   | normal       | WT       | WT      | WT          | WT          | WT    | MUT  | resistant                | resistant                  |
| 15    | 58  | m   | del13        | WT       | WT      | MUT         | WT          | WT    | WT   | resistant                | n.a.                       |
| 24    | 27  | w   | +21          | WT       | WT      | WT          | WT          | MUT   | WT   | resistant                | sensitive                  |
| 27    | 57  | w   | CBF          | WT       | WT      | WT          | WT          | WT    | WT   | resistant                | resistant                  |
| 37    | 20  | m   | +11          | WT       | WT      | WT          | WT          | n.a.  | WT   | resistant                | resistant                  |



**Supplemental Table 4: Differentially regulated Biocarta pathways among BV6- and DMSO-treated primary AML samples, according to LS/KS permutation testing (Pathway comparison).** Light grey script indicated pathways not significant in LS/KS testing, but in GSA test.

| Biocarta Pathway                                                        | Pathway description                                                                                      | Number of genes | LS p-value | KS p-value | Efron-Tibshirani's GSA test p-value |
|-------------------------------------------------------------------------|----------------------------------------------------------------------------------------------------------|-----------------|------------|------------|-------------------------------------|
| <b>pathways specifically deregulated in BV6 sensitive samples</b>       |                                                                                                          |                 |            |            |                                     |
| h DNAfragmentPathway                                                    | Apoptotic DNA fragmentation and tissue homeostasis                                                       | 15              | 0.00003    | 0.04441    | < 0.005                             |
| h smPathway                                                             | Spliceosomal Assembly                                                                                    | 22              | 0.00003    | 0.04504    | < 0.005                             |
| h il18Pathway                                                           | IL 18 Signaling Pathway                                                                                  | 7               | 0.00136    | 0.00337    | < 0.005                             |
| h rabPathway                                                            | Rab GTPases Mark Targets In The Endocytotic Machinery                                                    | 25              | 0.00242    | 0.04861    | < 0.005                             |
| h tnfr1Pathway                                                          | TNFR1 Signaling Pathway                                                                                  | 37              | 0.0038     | 0.00918    | < 0.005                             |
| h cpsfPathway                                                           | Polyadenylation of mRNA                                                                                  | 9               | 0.00931    | 0.01273    | < 0.005                             |
| h eif2Pathway                                                           | Regulation of eIF2                                                                                       | 18              | 0.01638    | 0.01819    | < 0.005                             |
| h d4gdiPathway                                                          | D4-GDI Signaling Pathway                                                                                 | 21              | 0.02449    | 0.28193    | < 0.005                             |
| h RacCycDPathway                                                        | Influence of Ras and Rho proteins on G1 to S Transition                                                  | 34              | 0.02801    | 0.05138    | < 0.005                             |
| h prc2Pathway                                                           | The PRC2 Complex Sets Long-term Gene Silencing Through Modification of Histone Tails                     | 13              | 0.03252    | 0.10773    | < 0.005                             |
| h bard1Pathway                                                          | BRCA1-dependent Ub-ligase activity                                                                       | 5               | 0.04497    | 0.08486    | < 0.005                             |
| h caspasePathway                                                        | Caspase Cascade in Apoptosis                                                                             | 36              | 0.04637    | 0.51603    | < 0.005                             |
| h aifPathway                                                            | Opposing roles of AIF in Apoptosis and Cell Survival                                                     | 5               | 0.29515    | 0.46769    | < 0.005                             |
| h nfkbPathway                                                           | NF-kB Signaling Pathway                                                                                  | 25              | 0.42002    | 0.08742    | < 0.005                             |
| <b>pathways specifically deregulated in BV6 resistant samples</b>       |                                                                                                          |                 |            |            |                                     |
| h ctlPathway                                                            | CTL mediated immune response against target cells                                                        | 16              | 0.00614    | 0.59215    | < 0.005                             |
| h ionPathway                                                            | Ion Channel and Phorbol Esters Signaling Pathway                                                         | 7               | 0.00849    | 0.02759    | < 0.005                             |
| h agpcrPathway                                                          | Attenuation of GPCR Signaling                                                                            | 13              | 0.0099     | 0.00023    | < 0.005                             |
| h chrebpPathway                                                         | ChREBP regulation by carbohydrates and cAMP                                                              | 12              | 0.01466    | 0.00003    | < 0.005                             |
| h raccPathway                                                           | Ion Channels and Their Functional Role in Vascular Endothelium                                           | 11              | 0.015      | 0.0001     | < 0.005                             |
| h il2Pathway                                                            | IL 2 signaling pathway                                                                                   | 22              | 0.01677    | 0.01018    | < 0.005                             |
| h pdgfrPathway                                                          | PDGF Signaling Pathway                                                                                   | 33              | 0.01736    | 0.00807    | < 0.005                             |
| h mhcPathway                                                            | Antigen Processing and Presentation                                                                      | 14              | 0.0193     | 0.01398    | < 0.005                             |
| h gcrPathway                                                            | Corticosteroids and cardioprotection                                                                     | 23              | 0.02473    | 0.001      | < 0.005                             |
| h gsPathway                                                             | Activation of cAMP-dependent protein kinase, PKA                                                         | 14              | 0.02478    | 0.00052    | < 0.005                             |
| h plcePathway                                                           | Phospholipase C-epsilon pathway                                                                          | 15              | 0.0251     | 0.00014    | < 0.005                             |
| h egfPathway                                                            | EGF Signaling Pathway                                                                                    | 36              | 0.02617    | 0.00662    | < 0.005                             |
| h pkcPathway                                                            | Activation of PKC through G protein coupled receptor                                                     | 8               | 0.03227    | 0.02533    | < 0.005                             |
| h cremPathway                                                           | Regulation of Spermatogenesis by CREM                                                                    | 8               | 0.0343     | 0.00133    | < 0.005                             |
| h il4Pathway                                                            | IL 4 signaling pathway                                                                                   | 7               | 0.03687    | 0.12185    | < 0.005                             |
| h ifngPathway                                                           | IFN gamma signaling pathway                                                                              | 13              | 0.04199    | 0.09419    | < 0.005                             |
| h myosinPathway                                                         | PKC-catalyzed phosphorylation of inhibitory phosphoprotein of myosin phosphatase                         | 22              | 0.04362    | 0.01643    | < 0.005                             |
| h cfrPathway                                                            | Cystic fibrosis transmembrane conductance regulator (CFTR) and beta 2 adrenergic receptor (b2AR) pathway | 12              | 0.0482     | 0.00287    | < 0.005                             |
| h stressPathway                                                         | TNF/Stress Related Signaling                                                                             | 31              | 0.04909    | 0.00733    | < 0.005                             |
| h mPRPathway                                                            | How Progesterone Initiates the Oocyte Maturation                                                         | 22              | 0.05098    | 0.01763    | < 0.005                             |
| h tubbyPathway                                                          | G-Protein Signaling Through Tubby Proteins                                                               | 8               | 0.05217    | 0.02533    | < 0.005                             |
| h bArrestinPathway                                                      | ?-arrestins in GPCR Desensitization                                                                      | 15              | 0.05415    | 0.00401    | < 0.005                             |
| h nos1Pathway                                                           | Nitric Oxide Signaling Pathway                                                                           | 6               | 0.10852    | 0.03352    | < 0.005                             |
| h ifnaPathway                                                           | IFN alpha signaling pathway                                                                              | 14              | 0.11202    | 0.02918    | < 0.005                             |
| h ptenPathway                                                           | PTEN dependent cell cycle arrest and apoptosis                                                           | 36              | 0.17184    | 0.04242    | < 0.005                             |
| h barr-mapkPathway                                                      | Role of $\beta$ -arrestins in the activation and targeting of MAP kinases                                | 18              | 0.17544    | 0.03456    | < 0.005                             |
| h atrbrcaPathway                                                        | Role of BRCA1, BRCA2 and ATR in Cancer Susceptibility                                                    | 23              | 0.5561     | 0.59134    | < 0.005                             |
| <b>pathways deregulated in both BV6 sensitive and resistant samples</b> |                                                                                                          |                 |            |            |                                     |
| h setPathway                                                            | Granzyme A mediated Apoptosis Pathway                                                                    | 20              | 0.00001    | 0.01475    | < 0.005                             |
| h glycolysisPathway                                                     | Glycolysis Pathway                                                                                       | 17              | 0.00015    | 0.00047    | 0.115                               |
| h iresPathway                                                           | Internal Ribosome entry pathway                                                                          | 16              | 0.00016    | 0.03141    | < 0.005                             |
| h eifPathway                                                            | Eukaryotic protein translation                                                                           | 25              | 0.00249    | 0.00867    | < 0.005                             |
| h SARSPathway                                                           | SARS Coronavirus Protease                                                                                | 10              | 0.00338    | 0.24913    | < 0.005                             |
| h ck1Pathway                                                            | Regulation of cdk1/cdk5 by type 1 glutamate receptors                                                    | 11              | 0.01807    | 0.00065    | < 0.005                             |
| h hifPathway                                                            | Hypoxia-Inducible Factor in the Cardiovascular System                                                    | 26              | 0.03089    | 0.18056    | < 0.005                             |
